# Supplementary material for: π–π Stacking, spin density and magnetic coupling strength
Source: Royal Society of Chemistry journal article supplement (doi:10.1039/c3dt51476e), 2013-01-01
Supplement: c3dt51476e.pdf [file c3dt51476e.pdf]

Electronic Supplementary Information (ESI) available: [details of any supplementary information available should be included here].

### ESI 1: Syntheses of the seven Cu<sup>II</sup> complexes

#### Syntheses of the used ligands:

1,10-phenanthroline-2-ol (PhenOH) was synthesized according to the literature (Qing Li et al. *Z. Anorg. Allg. Chem.*, 2012, 639, 181).

Synthesis of 2-(1H-pyrazol-1-yl)-1,10-phenanthroline (PhenP): K<sub>2</sub>CO<sub>3</sub> (4.60 g, 82 mmol) was added into a DMF solution (400 mL) containing 2-chloro-1,10-phenanthroline (4.29 g, 20 mmol) and pyrazole (6.81 g, 100 mmol) and the solution was refluxed for 24 hours. The solvent DMF was removed by vacuum distillation, and then 100 mL iced water was added into the remains and the mixture was stirred for half an hour and then a large amount of white deposition appeared. The deposition as product was separated from the solution and washed with iced water until the filtrate displayed neutral and then dried in vacuum (yield 3.92 g, 16 mmol). <sup>1</sup>H NMR (300 MHz, CDCl<sub>3</sub>, 24°C, TMS): δ=9.19 (s, 2H), 8.38 (brs, 2H), 8.27 (s, 1H), 7.82 (brs, 3H), 7.66 (s, 1H), 6.56 ppm (s, 1H); HRMS (ESI): m/z calcd for C<sub>15</sub>H<sub>10</sub>N<sub>4</sub>+H<sup>+</sup>: 247.0978 [M+H<sup>+</sup>]; found: 247.0982.

Synthesis of 2-(1H-1,2,4-triazol-1-yl)-1,10-phenanthroline (PhenTA): K<sub>2</sub>CO<sub>3</sub> (4.60 g, 82 mmol) was added into a DMF solution (250 mL) containing 2-chloro-1,10-phenanthroline (2.45 g, 11 mmol) and 1H-1,2,4-triazole (3.00 g, 43 mmol) and the solution was refluxed for 24 hours. The solvent DMF was removed by vacuum distillation, and then iced water (100 mL) was added into the remains and the mixture was stirred for half an hour and a large amount of white deposition appeared. The deposition was washed with iced water until the filtrate was neutral and then dried in vacuum (yield 2.15 g, 8.7 mmol). <sup>1</sup>H NMR (300 MHz, CDCl<sub>3</sub>, 23°C, TMS): δ=9.83 (s, 1H), 9.20 (s, 1H), 8.47 (d, J=9 Hz, 1H), 8.31 (d, J=9 Hz, 2H), 8.18 (s, 1H), 7.86 (s, 2H), 7.69-7.73 ppm (m, 1H); HRMS (ESI): m/z calcd for C<sub>14</sub>H<sub>9</sub>N<sub>5</sub>+H<sup>+</sup>: 248.0930 [M+H<sup>+</sup>]; found: 248.0919.

Synthesis of 2-(3-methyl-pyrazol-1H-yl)-1,10-phenanthroline (PhenMP): A flask containing 2-chloro-1,10-phenanthroline (1.07 g, 5 mmol), KOH (0.56 g, 10 mmol) and 3-methyl-pyrazole (2.05 g, 25 mmol) was placed in a microwave oven and irradiated for 30 minutes under temperature 60°C. And then ethanol (50 mL) was added into the flask and stirred for a few minutes. The yellowish product (1.0 g, 3.8 mmol) was obtained after the insoluble was separated from the solution and dried in vacuum. <sup>1</sup>H NMR (300 MHz, CDCl<sub>3</sub>, 24°C, TMS): δ=9.21 (d, J=3 Hz, 2H), 8.39-8.29 (m, 3H), 7.83-7.65 (m, 3H), 6.36 (s, 1H), 2.43 ppm (s, 3H); HRMS (ESI): m/z calcd for C<sub>16</sub>H<sub>12</sub>N<sub>4</sub>+H<sup>+</sup>: 261.1134 [M+H<sup>+</sup>]; found: 261.1140.

Synthesis of 2-(3-amine-pyrazol-1H-yl)-1,10-phenanthroline (PhenAP): KOH (2.10 g, 37 mmol) was added into a DMF solution (80 mL) of 2-chloro-1,10-phenanthroline (4.29 g, 20 mmol) and 3-amine-pyrazole (1.99 g, 24 mmol) and the mixture was stirred and refluxed for 96 hours. The deposition appeared after iced water (100 mL) was added into the solution, and then the deposition was recrystallized in a mixed solvent of ethanol and water (7:3). The yellowish powder product (3.68 g, 14 mmol) was obtained after vacuum drying of the recrystallized microcrystals. <sup>1</sup>H NMR (300 MHz, CDCl<sub>3</sub>, 25°C, TMS): δ=9.17 (s, 1H), 8.30-8.17 (m, 4H), 7.79-7.63 (m, 4H), 3.97 ppm (s, 2H); HRMS (ESI): m/z calcd for C<sub>15</sub>H<sub>11</sub>N<sub>5</sub>+H<sup>+</sup>: 262.1087 [M+H<sup>+</sup>]; found: 262.1091.

#### Syntheses of the seven Cu<sup>II</sup> complexes:

Synthesis of Complex C1 [Cu(PhenOH)Cl(OH)]: the H<sub>2</sub>O solution (10 mL) of CuCl<sub>2</sub>·2H<sub>2</sub>O (0.0341 g, 0.200 mmol) was added into a methanol solution (10 mL) containing 2-hydroxy-1,10-phenanthroline (0.0375 g, 0.191 mmol) and the mixed solution was stirred for a few minutes. The purple single crystals were obtained after the filtrate was allowed to stand and slowly evaporate at room temperature for about two weeks. IR (cm<sup>-1</sup>): 3069(s), 1625(m), 1586(m), 1559(m), 1504(s), 1483(s), 1452(s), 1422(s), 1386(s), 1141(w), 847(s), 700(s). Elemental analysis calcd (%) for C<sub>12</sub>H<sub>9</sub>ClCuN<sub>2</sub>O<sub>2</sub>: C 46.16, H 2.91, N 8.98, Cu 20.35; Found: C 46.32, H 3.21, N 8.65, Cu 20.73.

Synthesis of Complex C2 [Cu(PhenP)(ONO<sub>2</sub>)<sub>2</sub>]: the methanol solution of Cu(NO<sub>3</sub>)<sub>2</sub>·3H<sub>2</sub>O (0.0564 g, 0.233 mmol) (10 mL) was added into a methanol solution of 2-(1H-pyrazol-1-yl)-1,10-phenanthroline (0.0525 g, 0.212 mmol) (10 mL) and the mixed solution was stirred for a few minutes. The green single crystals were obtained after the filtrate was allowed to stand and slowly evaporated at room temperature for a week. IR (cm<sup>-1</sup>): 1616(w), 1597(w), 1533(m), 1508(w), 11384(s). Elemental analysis calcd (%) for C<sub>15</sub>H<sub>10</sub>CuN<sub>6</sub>O<sub>6</sub>: C 41.53, H 2.32, N 19.38, Cu 14.65; Found: C 41.21, H 2.50, N 19.76, Cu 14.96.

Synthesis of Complex C3 [Cu(PhenTA)]<sub>2</sub>(ClO<sub>4</sub>)<sub>2</sub>·CH<sub>3</sub>CH<sub>2</sub>OH: the methanol solution of Cu(ClO<sub>4</sub>)<sub>2</sub>·6H<sub>2</sub>O (0.0630 g, 0.170 mmol) (10 mL) was added into a methanol solution of 2-(1H-1,2,4-triazol-1-yl)-1,10-phenanthroline (0.0845 g, 0.342 mmol) (10 mL) and the mixed solution was stirred for a few minutes. The blue single crystals were obtained after the filtrate was allowed to stand and slowly evaporated at room temperature for two weeks. IR (cm<sup>-1</sup>): 1595(m), 1525(s), 1432(m), 1399(s), 1296(m), 1225(m), 1085(s). Elemental analysis calcd (%) for C<sub>30</sub>H<sub>24</sub>Cl<sub>2</sub>CuN<sub>10</sub>O<sub>9</sub>: C 44.87, H 3.01, N 17.44, Cu 7.91; Found: C 44.63, H 3.28, N 17.35, Cu 7.69.

Synthesis of Complex C4 [Cu(PhenMP)Cl<sub>2</sub>]: the methanol solution of CuCl<sub>2</sub>·2H<sub>2</sub>O (0.3440 g, 2.02 mmol) (10 mL) was added into a methanol solution containing 2-(3-methyl-pyrazol-1H-yl)-1,10-phenanthroline (0.5180 g, 1.99 mmol) (10 mL), and the mixed solution was stirred for a few minutes. The green single crystals were obtained after the filtrate was allowed to stand and slowly evaporate at room temperature for about a week. IR (cm<sup>-1</sup>): 1613(m), 1593(m), 1547(m), 1509(m), 1399(s), 1354(m). Elemental analysis calcd (%) for C<sub>12</sub>H<sub>12</sub>Cl<sub>2</sub>CuN<sub>4</sub>: C 36.51, H 3.06, N 14.19, Cu 16.10; Found: C 36.76, H 3.25, N 14.35, Cu 16.49.

Synthesis of Complex C5 [Cu(PhenMP)Br<sub>2</sub>]: the blue crystal of this complex was synthesized as the similar process as complex 2 except CuCl<sub>2</sub>·2H<sub>2</sub>O was replaced with CuBr<sub>2</sub>. IR (cm<sup>-1</sup>): 1639(s), 1592(m), 1545(m), 1509(m), 1398(s), 1353(w). Elemental analysis calcd (%) for C<sub>12</sub>H<sub>12</sub>Br<sub>2</sub>CuN<sub>4</sub>: C 29.80, H 2.50, N 11.58, Cu 13.14; Found: C 30.01, H 2.81, N 11.83, Cu 13.49.

Synthesis of Complex C6 [Cu(PhenAP)(ONO<sub>2</sub>)(HOCH<sub>3</sub>)]·NO<sub>3</sub>: the methanol solution of Cu(NO<sub>3</sub>)<sub>2</sub>·3H<sub>2</sub>O (0.0507 g, 0.21 mmol) (10 mL) was added into a methanol solution containing 2-(3-amine-pyrazol-1H-yl)-1,10-phenanthroline (0.0549 g, 0.21 mmol) (10 mL) and the mixed solution was stirred for a few minutes. The green single crystals were obtained after the filtrate was allowed to stand and slowly evaporate at room temperature for four days. IR (cm<sup>-1</sup>): 3426(s), 1629(m), 1591(m), 1563(m), 1522(m), 1467(m), 1426(m), 1384(s). Elemental analysis calcd (%) for C<sub>16</sub>H<sub>15</sub>CuN<sub>7</sub>O<sub>7</sub>: C 39.96, H 3.14, N 20.39, Cu 13.21; Found: C 40.25, H 3.31, N 20.01, Cu 13.60.

Synthesis of Complex C7 [Cu(PhenAP)Cl<sub>2</sub>]: the aqueous solution of CuCl<sub>2</sub>·2H<sub>2</sub>O (0.0341 g, 0.200 mmol) (10 mL) was added into a methanol solution of 2-(3-amine-pyrazol-1H-yl)-1,10-phenanthroline (0.0549 g, 0.21 mmol) (10 mL). The mixture was stirred for a few minutes and filtrated. The orange single crystals were obtained after the filtrate was allowed to stand and slowly evaporate at room temperature for about one week. IR (cm<sup>-1</sup>): 3393(s), 3307(s), 1613(s), 1589(m), 1561(m), 1519(s), 1468(m), 1442(w), 1422(m), 1394(w), 1339(w), 1144(w), 949(w). Elemental analysis calcd for C<sub>15</sub>H<sub>11</sub>Cl<sub>2</sub>CuN<sub>5</sub>: C 45.52, H 2.80, N 17.70, Cu 16.06; Found: C 45.80, H 2.98, N 18.05, Cu 16.35.

All other chemicals are analytical grade and used without further purification.

**ESI 2: Selected bond lengths, associated angles and hydrogen bond for the seven Cu<sup>II</sup> complexes.**

ESI 2: Table 1-1: Selected bond lengths (Å) and angles (°) for C1 Complex.

|            |            |            |            |            |           |            |            |            |            |
|------------|------------|------------|------------|------------|-----------|------------|------------|------------|------------|
| Cu1-C11    | 2.2227(15) | Cu1-N1     | 2.033(4)   | Cu1-N2     | 1.964(4)  | Cu1-O2     | 1.913(4)   | Cu2-Cl2    | 2.2310(14) |
| Cu2-N3     | 2.015(4)   | Cu2-N4     | 1.962(4)   | Cu2-O4     | 1.941(3)  | Cu3-Cl3    | 2.2260(15) | Cu3-N5     | 2.014(4)   |
| Cu3-N6     | 1.986(4)   | Cu3-O6     | 1.908(4)   |            |           |            |            |            |            |
| N1-Cu1-C11 | 177.01(13) | O2-Cu1-N2  | 169.6(2)   | N2-Cu1-C11 | 94.37(13) | O2-Cu1-C11 | 91.52(14)  | O2-Cu1-N1  | 91.22(18)  |
| N2-Cu1-N1  | 83.09(17)  |            |            |            |           |            |            |            |            |
| O4-Cu2-N4  | 173.02(16) | N3-Cu2-Cl2 | 170.57(12) | N4-Cu2-Cl2 | 94.04(12) | O4-Cu2-N3  | 92.10(16)  | O4-Cu2-Cl2 | 91.84(12)  |
| N4-Cu2-N3  | 82.67(15)  |            |            |            |           |            |            |            |            |
| N5-Cu3-Cl3 | 177.73(12) | O6-Cu3-N6  | 174.30(16) | N6-Cu3-Cl3 | 95.08(13) | O6-Cu3-N5  | 92.40(15)  | O6-Cu3-Cl3 | 89.85(12)  |
| N6-Cu3-N5  | 82.66(16)  |            |            |            |           |            |            |            |            |

ESI 2: Table 1-2 Hydrogen bonds for C1 Complex.

| D-H...A             | d(D-H) | d(H...A) | d(D...A) | <(DHA) |
|---------------------|--------|----------|----------|--------|
| O(1)-H(1X)...O(2)   | 0.85   | 1.65     | 2.487(6) | 167    |
| O(2)-H(2X)...O(5)#1 | 0.85   | 1.87     | 2.652(6) | 152    |
| O(3)-H(3X)...O(4)   | 0.85   | 1.66     | 2.503(5) | 173    |
| O(4)-H(4X)...O(1)#2 | 0.85   | 1.92     | 2.715(5) | 154    |
| O(5)-H(5X)...O(6)   | 0.85   | 1.73     | 2.570(5) | 168    |
| O(6)-H(6X)...O(3)#3 | 0.85   | 1.99     | 2.780(5) | 155    |

Symmetry transformations used to generate equivalent atoms: #1: x+1, y-1, z; #2: x, y+1, z; #3: x-1, y, z.

ESI 2: Table 2-1: Selected bond lengths (Å) and angles (°) for C2 Complex.

|           |            |           |            |           |            |           |            |           |           |
|-----------|------------|-----------|------------|-----------|------------|-----------|------------|-----------|-----------|
| Cu1-N3    | 1.928(3)   | Cu1-O2    | 1.949(3)   | Cu1-N4    | 2.077(3)   | Cu1-N2    | 2.077(3)   | Cu1-O5    | 2.258(5)  |
| O2-Cu1-O5 | 107.44(17) | O2-Cu1-N2 | 104.48(14) | O2-Cu1-N3 | 160.01(14) | O2-Cu1-N4 | 96.34(13)  | O5-Cu1-N2 | 90.34(16) |
| O5-Cu1-N3 | 92.38(17)  | O5-Cu1-N4 | 90.38(15)  | N2-Cu1-N3 | 77.32(13)  | N2-Cu1-N4 | 157.92(13) | N3-Cu1-N4 | 80.60(13) |

ESI 2: Table 3-1: Selected bond lengths (Å) and angles (°) for C3 Complex.

|           |            |           |            |           |            |           |            |           |            |
|-----------|------------|-----------|------------|-----------|------------|-----------|------------|-----------|------------|
| Cu1-N9    | 2.343(3)   | Cu1-N1    | 2.270(3)   | Cu1-N6    | 2.195(3)   | Cu1-N5    | 2.143(3)   | Cu1-N7    | 1.963(3)   |
| Cu1-N4    | 1.954(3)   |           |            |           |            |           |            |           |            |
| N4-Cu1-N7 | 174.98(11) | N5-Cu1-N1 | 155.12(10) | N6-Cu1-N9 | 152.31(10) | N7-Cu1-N1 | 109.57(11) | N4-Cu1-N9 | 105.40(11) |
| N4-Cu1-N6 | 101.79(11) | N5-Cu1-N6 | 97.55(11)  | N7-Cu1-N5 | 95.08(11)  | N5-Cu1-N9 | 92.24(11)  | N1-Cu1-N9 | 91.22(11)  |
| N6-Cu1-N1 | 90.63(11)  | N4-Cu1-N5 | 79.90(11)  | N7-Cu1-N6 | 78.86(11)  | N4-Cu1-N1 | 75.43(11)  | N7-Cu1-N9 | 74.51(11)  |

ESI 2: Table 3-2. Hydrogen bonds for C3 Complex.

| D-H...A              | d(D-H) | d(H...A) | d(D...A) | <(DHA) |
|----------------------|--------|----------|----------|--------|
| O(9)-H(9A)...N(10)#1 | 0.82   | 2.31     | 3.101(5) | 163.0  |

Symmetry transformations used to generate equivalent atoms: #1 x-1/2,-y+1/2,z+1/2.

ESI 2: Table 4-1: Selected bond lengths (Å) and angles (°) for C4 Complex.

|            |            |            |            |             |           |            |           |            |           |
|------------|------------|------------|------------|-------------|-----------|------------|-----------|------------|-----------|
| Cu1-Cl1    | 2.4322(10) | Cu1-Cl2    | 2.2086(11) | Cu1-N1      | 2.105(3)  | Cu1-N4     | 2.105(3)  | Cu1-N2     | 1.962(3)  |
| N4-Cu1-N1  | 154.30(11) | N2-Cu1-Cl2 | 150.43(8)  | Cl2-Cu1-Cl1 | 107.87(4) | N2-Cu1-Cl1 | 101.69(8) | N4-Cu1-Cl2 | 100.65(8) |
| N1-Cu1-Cl2 | 97.97(8)   | N4-Cu1-Cl1 | 96.35(8)   | N1-Cu1-Cl1  | 94.61(8)  | N2-Cu1-N1  | 78.66(10) | N2-Cu1-N4  | 76.39(10) |

ESI 2: Table 5-1: Selected bond lengths (Å) and angles (°) for C5 Complex.

|            |            |            |            |             |           |            |            |            |           |
|------------|------------|------------|------------|-------------|-----------|------------|------------|------------|-----------|
| Cu1-Br2    | 2.5624(7)  | Cu1-Br1    | 2.3563(7)  | Cu1-N1      | 2.104(3)  | Cu1-N4     | 2.103(3)   | Cu1-N3     | 1.966(3)  |
| N4-Cu1-N1  | 154.70(12) | N3-Cu1-Br1 | 147.65(10) | Br1-Cu1-Br2 | 108.34(3) | N3-Cu1-Br2 | 104.00(10) | N1-Cu1-Br1 | 100.70(9) |
| N4-Cu1-Br1 | 97.51(9)   | N1-Cu1-Br2 | 95.43(10)  | N4-Cu1-Br2  | 95.33(9)  | N3-Cu1-N4  | 78.82(13)  | N3-Cu1-N1  | 76.39(12) |

ESI 2: Table 6-1: Selected bond lengths (Å) and angles (°) for C6 Complex.

|           |            |           |            |           |           |           |            |           |            |
|-----------|------------|-----------|------------|-----------|-----------|-----------|------------|-----------|------------|
| Cu1-N2    | 1.923(3)   | Cu1-O7    | 1.957(3)   | Cu1-N4    | 2.035(4)  | Cu1-N1    | 2.069(4)   | Cu1-O1    | 2.206(4)   |
| N2-Cu1-N4 | 77.84(15)  | N2-Cu1-N1 | 80.16(16)  | O7-Cu1-O1 | 92.39(15) | N4-Cu1-O1 | 93.54(13)  | N1-Cu1-O1 | 93.92(15)  |
| N2-Cu1-O1 | 102.59(15) | O7-Cu1-N4 | 103.43(15) | O7-Cu1-N1 | 97.10(15) | N4-Cu1-N1 | 157.82(13) | N2-Cu1-O7 | 164.90(12) |

ESI 2 Table 6-2. Hydrogen bonds for C6 Complex.

| D-H...A             | d(D-H) | d(H...A) | d(D...A) | <(DHA) |
|---------------------|--------|----------|----------|--------|
| N(5)-H(5A)...O(7)#1 | 0.86   | 2.54     | 3.138(5) | 127.4  |
| N(5)-H(5B)...O(4)#2 | 0.86   | 2.15     | 2.985(7) | 163.8  |
| O(1)-H(4)...O(2)    | 0.94   | 1.83     | 2.758(6) | 170.9  |
| O(1)-H(4)...N(7)    | 0.94   | 2.65     | 3.469(7) | 147.0  |

Symmetry transformations used to generate equivalent atoms: #1 -x+2,-y+1,-z+1 #2 -x+2,-y+2,-z+1

ESI 2: Table 7-1: Selected bond lengths (Å) and angles (°) for C7 Complex.

|            |            |            |            |             |           |            |           |            |           |
|------------|------------|------------|------------|-------------|-----------|------------|-----------|------------|-----------|
| Cu1-C11    | 2.2507(11) | Cu1-C12    | 2.4448(11) | Cu1-N1      | 2.092(3)  | Cu1-N4     | 2.074(3)  | Cu1-N2     | 1.967(3)  |
| N2-Cu1-C11 | 156.74(10) | N4-Cu1-N1  | 153.14(12) | C11-Cu1-C12 | 102.42(4) | N4-Cu1-C11 | 101.26(9) | N2-Cu1-C12 | 100.84(9) |
| N1-Cu1-C12 | 99.09(9)   | N4-Cu1-C12 | 96.72(9)   | N1-Cu1-C11  | 96.39(9)  | N2-Cu1-N1  | 79.41(13) | N2-Cu1-N4  | 76.37(13) |

### ESI 3: The information of the intermolecular magnetic coupling properties of the seven Cu<sup>II</sup> complexes.

**Magnetism of Complex C1.** The experimental data of the variable-temperature (2.00–330 K) magnetic susceptibilities are shown in ESI 3 Fig. 1, where  $\chi_M$  is the molar magnetic susceptibility per binuclear Cu<sup>II</sup> unit,  $\mu_{eff}$  is the magnetic moment per binuclear Cu<sup>II</sup> ions. ESI 3 Fig. 1 displays that the  $\chi_M$  value increases with decreasing temperature and reaches a maximum at 2.00 K. The  $\mu_{eff}$  value at 300 K is 2.57 B.M., which is a little larger than isolated binuclear Cu<sup>II</sup> ions (2.45 B.M.  $g_{av} = 2$ ) at room temperature. The  $\mu_{eff}$  value decreases very slowly with temperature drop until about 14 K, and then the  $\mu_{eff}$  values decreases sharply with temperature drop and reaches 2.06 B.M. at 2.00 K, which suggests that there is an anti-ferromagnetic coupling between the adjacent Cu<sup>II</sup> ions. The modified Bleaney-Bowers binuclear Cu<sup>II</sup> fitting formulae (2) and (3) were used to fit the experimental data and the obtaining fitting parameters are  $g = 2.10$ ,  $2J = -0.82 \text{ cm}^{-1}$ ,  $zJ' = -0.94 \text{ cm}^{-1}$ ,  $R = \sum(\chi_{obsd} - \chi_{calcd})^2 / (\chi_{obsd})^2 = 5.0 \times 10^{-5}$ . The data of the experimental magnetic susceptibility also fit Curie-Weiss formula with Weiss constant  $\theta = -1.34 \text{ K}$ .

$$\hat{H} = -2J\hat{S}_{Cu}\hat{S}_{Cu} \quad (1)$$

$$\chi = \frac{2Ng^2\beta^2}{\kappa T} [3 + \exp(-2J / \kappa T)]^{-1} + N_a \quad (2)$$

$$\chi_M = \frac{\chi}{1 - \frac{zJ'}{Ng^2\beta^2}} \quad (3)$$

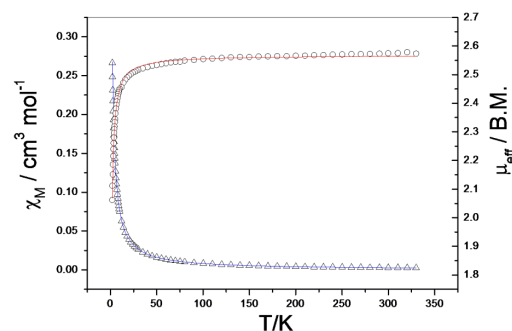

ESI 3 Figure 1: Plots of  $\chi_M$  (the open triangle for the experimental data) and  $\mu_{eff}$  (the open circle for the experimental data) versus T for Complex C1.

**Magnetism of Complex C2.** The experimental data of the variable-temperature (2.00–300 K) magnetic susceptibilities are shown in ESI 3 Fig. 2, where  $\chi_M$  is the molar magnetic susceptibility per binuclear Cu<sup>II</sup> unit,  $\mu_{eff}$  is the magnetic moment per binuclear Cu<sup>II</sup> ions. ESI 3 Figure 2 displays that the  $\chi_M$  value increases with decreasing temperature, reaches a maximum at 2.00 K. The  $\mu_{eff}$  value at 300 K is 2.65 B.M., which is larger than that of isolated binuclear Cu<sup>II</sup> ions (2.45 B.M. for  $g_{av} = 2.0$ ) at room temperature, and the  $\mu_{eff}$  value fluctuates among the range of 2.65 B. M. and 2.66 B.M. in the temperature range of 300 K to 2.00 K, which suggests that there exists no magnetic interaction among the adjacent Cu<sup>II</sup> ions. The fitting for the variable-temperature magnetic susceptibility data based on an Bleaney-Bowers binuclear Cu<sup>II</sup> fitting equation (4) (Bleaney, B.; Bowers, K. D. Proc. R. SOC., London 1952, A214, 451.) gave the relevant fitting parameters:  $g = 2.17$ ,  $2J = 0.008 \text{ cm}^{-1}$  and agreement factor  $R = 9.85 \times 10^{-6}$ .

$$\chi_m = \frac{2Ng^2\beta^2}{\kappa T} [3 + \exp(-2J/\kappa T)]^{-1} \quad (4)$$

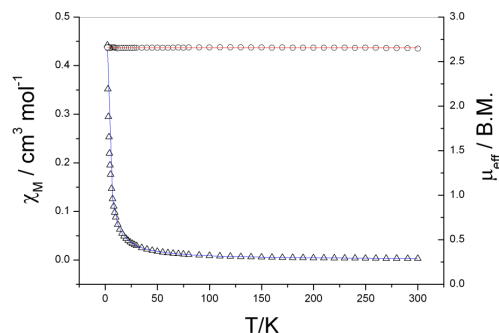

ESI 3 Figure 2: Plots of  $\chi_M$  (the open triangle for the experimental data and the blue curve for the fitting values) and  $\mu_{eff}$  (the open circle for the experimental data and the red curve for the fitting value) versus T for Complex C2.

**Magnetism of Complex C3.** The experimental data of the variable-temperature (2.00–300 K) magnetic susceptibilities are shown in ESI 3 Figure 3, where  $\chi_M$  is the molar magnetic susceptibility per binuclear  $\text{Cu}^{\text{II}}$  unit,  $\mu_{eff}$  is the magnetic moment per binuclear  $\text{Cu}^{\text{II}}$  ions. ESI 3 Figure 3 displays that the  $\chi_M$  value increases with decreasing temperature, reaches a maximum at 2.00 K. The  $\mu_{eff}$  value at 300 K is 2.75 B.M., which is larger than that of isolated binuclear  $\text{Cu}^{\text{II}}$  ions (2.45 B.M. for  $g_{av} = 2.0$ ) at room temperature, and the  $\mu_{eff}$  value increases very slowly with temperature drop until about 12 K, and then it increases sharply to 4.45 B. M. at 2.00 K, which suggests that there is a ferromagnetic coupling among the adjacent  $\text{Cu}^{\text{II}}$  ions. The modified Bleaney-Bowers equations (2) and (3) for exchange coupled dimer  $\text{Cu}^{\text{II}}$  ( $H = -2JS_1S_2$ ) were used to fit the magnetic data. The equations (2) and (3) gave a good fitting for the experimental data as shown in ESI 3 Figure 3, and the obtained magnetic parameters are  $g = 2.34$ ,  $2J = 4.17 \text{ cm}^{-1}$ ,  $zJ' = 0.93 \text{ cm}^{-1}$ , and agreement factor  $R = 3.25 \times 10^{-3}$ .

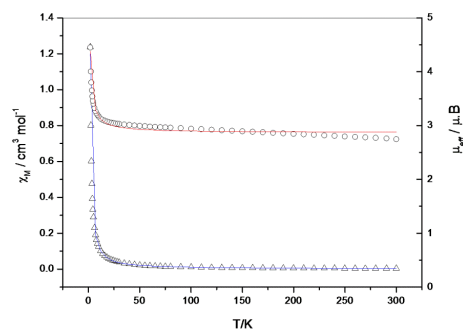

ESI 3 Figure 3: Plots of  $\chi_M$  (the open triangle for the experimental data and the blue curve for the fitting values) and  $\mu_{eff}$  (the open circle for the experimental data and the red curve for the fitting value) versus T for Complex C3.

**Magnetism of Complex C4.** ESI 3 Figure 4 shows the experimental variable-temperature magnetic data (2.00–330 K) based on per binuclear unit and its magnetic moments change from 2.64 B. M. at 300 K to 1.62 B. M. at 2.00 K. The fitting using binuclear  $\text{Cu}^{\text{II}}$  equations as Complex C3 gave the relevant fitting magnetic parameters:  $g = 2.14$ ,  $2J = -2.63 \text{ cm}^{-1}$ ,  $zJ' = -0.54 \text{ cm}^{-1}$ , and agreement factor  $R = 1.10 \times 10^{-4}$ .

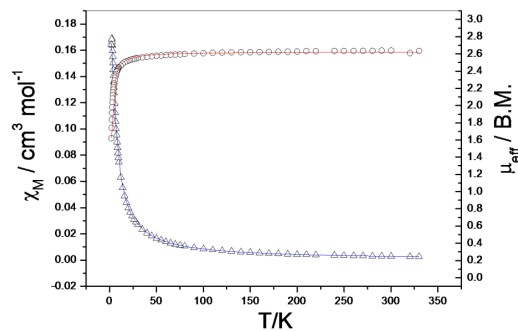

ESI 3 Figure 4: Plots of  $\chi_M$  (the open triangle for the experimental data and the blue curve for the fitting values) and  $\mu_{eff}$  (the open circle for the experimental data and the red curve for the fitting value) versus T for Complex C4.

**Magnetism of Complex C5.** ESI 3 Figure 5 displays the magnetic information of Complex C5 (2.00–330 K) based on per binuclear  $\text{Cu}^{\text{II}}$  unit and its magnetic moments range from 2.77 B. M. at 330 K to 1.15 B. M. at 2.00 K. The fitting with the identical equations as Complex C3 gave the following fitting parameters:  $g = 2.23$ ,  $2J = -3.67 \text{ cm}^{-1}$ ,  $zJ' = -3.31$

$\text{cm}^{-1}$ , and agreement factor  $R = 7.30 \times 10^{-4}$ , and the fitting with Curie-Weiss formula gave the Weiss constant  $\theta = -6.52 \text{ K}$ .

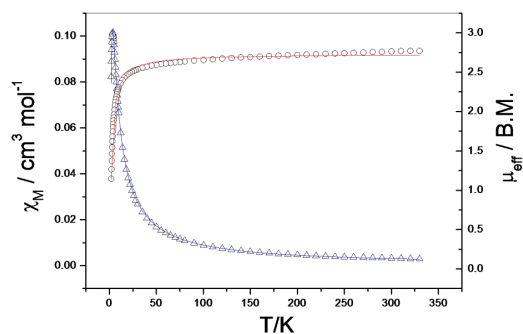

ESI 3 Figure 5: Plots of  $\chi_M$  (the open triangle for the experimental data and the blue curve for the fitting values) and  $\mu_{\text{eff}}$  (the open circle for the experimental data and the red curve for the fitting value) versus T for Complex C5.

**Magnetism of Complex C6.** ESI 3 Figure 6 shows the data of the variable-temperature (2.00 K – 330 K) magnetic susceptibility of Complex C6, where  $\mu_{\text{eff}}$  is the magnetic moment per binuclear  $\text{Cu}^{\text{II}}$  ions. The  $\mu_{\text{eff}}$  value at 330 K is 2.44 B. M. and then it increases very slowly as temperature drops until 34.00 K with the maximum value 2.55 B. M., and then it decreases very slowly and reaches to 2.51 B. M. at 2.00 K, which indicates that there is a very weak magnetic interaction among the adjacent  $\text{Cu}^{\text{II}}$  ions. The fitting equation (5) gave the following fitting parameters:  $g = 2.04$ ,  $2J = 1.25 \text{ cm}^{-1}$ ,  $\theta = -0.54 \text{ K} = -0.37 \text{ cm}^{-1}$  and  $R = 5.40 \times 10^{-4}$ . The Weiss constant from Curie-Weiss formula is 1.65 K.

$$\chi = \frac{2N_g^2 \beta^2}{\kappa(T - \theta)} [3 + \exp(-2J / \kappa T)]^{-1} + N_\alpha \quad (5)$$

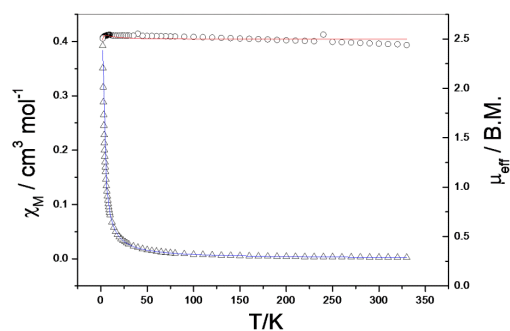

ESI 3 Figure 6: Plots of  $\chi_M$  (the open triangle for the experimental data and the blue curve for the fitting values) and  $\mu_{\text{eff}}$  (the open circle for the experimental data and the red curve for the fitting value) versus T for Complex C6.

**Magnetism of Complex C7.** ESI 3 Figure 7 displays the data of the variable-temperature (2.00 – 300 K) magnetic susceptibility of this complex, where  $\mu_{\text{eff}}$  is the magnetic moment per binuclear  $\text{Cu}^{\text{II}}$  ions. The value of magnetic moment is constant (2.64 B. M.) in the temperature range of 330 K to 179.92 K and then it decreases with temperature drop and reaches to 2.29 B. M. at 2.00 K. The fitting parameters, which were obtained from the equations (3) and (4), are  $g = 2.15$ ,  $2J = -0.28 \text{ cm}^{-1}$ ,  $zJ' = -0.72 \text{ cm}^{-1}$  and  $R = 5.0 \times 10^{-5}$ . The Weiss constant obtained from Curie-Weiss formula is -0.96 K.

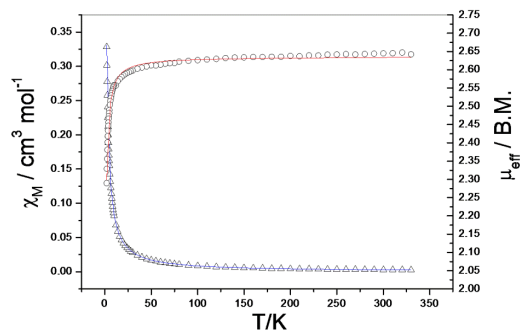

ESI 3 Figure 7: Plots of  $\chi_M$  (the open triangle for the experimental data and the blue curve for the fitting values) and  $\mu_{\text{eff}}$  (the open circle for the experimental data and the red curve for the fitting value) versus T for Complex C7.

**ESI 4: The spin densities on the atoms of the  $\pi$ - $\pi$  stacking systems**

ESI 4 Table 1: Spin densities for C1 Complex.

| Atom | Spin density |
|------|--------------|------|--------------|------|--------------|------|--------------|------|--------------|
| C1   | 0.012652     | C13  | 0.007386     | C25  | 0.011017     | C1A  | 0.004781     | C25A | 0.009185     |
| C2   | 0.013251     | C14  | 0.015615     | C26  | 0.017383     | C2A  | 0.007552     | C26A | -0.000673    |
| C3   | -0.001528    | C15  | 0.005743     | C27  | -0.009968    | C3A  | 0.001185     | C27A | -0.008843    |
| C4   | -0.004709    | C16  | 0.006492     | C28  | -0.004399    | C4A  | 0.014470     | C28A | 0.001740     |
| C5   | 0.003025     | C17  | -0.009551    | C29  | 0.014502     | C5A  | -0.008748    | C29A | 0.006736     |
| C6   | -0.003672    | C18  | -0.007311    | C30  | 0.006784     | C6A  | -0.011054    | C30A | 0.002808     |
| C7   | 0.001436     | C19  | 0.021592     | C31  | -0.002917    | C7A  | 0.012712     | C31A | 0.001318     |
| C8   | 0.000658     | C20  | -0.005492    | C32  | -0.003231    | C8A  | -0.004304    | C32A | -0.005023    |
| C9   | 0.009498     | C21  | -0.015763    | C33  | 0.008411     | C9A  | 0.003986     | C33A | 0.002448     |
| C10  | -0.012462    | C22  | -0.013875    | C34  | -0.014885    | C10A | -0.007616    | C34A | -0.010183    |
| C11  | -0.008879    | C23  | 0.001628     | C35  | -0.007688    | C11A | 0.002945     | C35A | 0.007397     |
| C12  | -0.007334    | C24  | -0.011513    | C36  | -0.020233    | C12A | -0.013159    | C36A | -0.000652    |
| C1I  | 0.166397     | C12  | 0.164941     | C13  | 0.160243     | C1A  | 0.177503     | C13A | 0.179552     |
| Cu1  | 0.513980     | Cu2  | 0.510910     | Cu3  | 0.514711     | Cu1A | 0.494638     | Cu3A | 0.495643     |
| N1   | 0.071101     | N3   | 0.068593     | N5   | 0.076780     | N1A  | 0.070808     | N5A  | 0.067943     |
| N2   | 0.098436     | N4   | 0.095059     | N6   | 0.085218     | N2A  | 0.075020     | N6A  | 0.075002     |
| O1   | -0.016617    | O3   | -0.015385    | O5   | -0.016010    | O1A  | -0.009429    | O5A  | -0.012603    |
| O2   | 0.163773     | O4   | 0.175565     | O6   | 0.177566     | O2A  | 0.180400     | O6A  | 0.184406     |

ESI 4 Table 2: Spin densities for C2 Complex.

| Atom | Spin density |
|------|--------------|------|--------------|------|--------------|------|--------------|
| C1   | -0.006621    | C1A  | -0.003375    | C1B  | -0.006835    | C1C  | -0.007428    |
| C2   | -0.015735    | C2A  | -0.014937    | C2B  | -0.009705    | C2C  | -0.005306    |
| C3   | 0.004243     | C3A  | 0.003803     | C3B  | 0.003561     | C3C  | 0.000920     |
| C4   | -0.009565    | C4A  | -0.005182    | C4B  | -0.007234    | C4C  | -0.006361    |
| C5   | 0.006717     | C5A  | 0.006096     | C5B  | 0.005937     | C5C  | 0.006040     |
| C6   | 0.001869     | C6A  | 0.008264     | C6B  | -0.005064    | C6C  | 0.002481     |
| C7   | -0.001014    | C7A  | 0.001115     | C7B  | 0.000480     | C7C  | -0.000310    |
| C8   | 0.001939     | C8A  | 0.001448     | C8B  | 0.002693     | C8C  | 0.001259     |
| C9   | -0.010142    | C9A  | -0.004701    | C9B  | -0.006913    | C9C  | -0.005253    |
| C10  | 0.003691     | C10A | 0.003434     | C10B | 0.001880     | C10C | 0.004630     |
| C11  | -0.007385    | C11A | -0.007825    | C11B | -0.009094    | C11C | -0.006258    |
| C12  | 0.006185     | C12A | 0.005529     | C12B | 0.007738     | C12C | 0.005508     |
| C13  | -0.019983    | C13A | -0.010584    | C13B | -0.010796    | C13C | -0.014446    |
| C14  | -0.010940    | C14A | -0.010318    | C14B | -0.009607    | C14C | -0.009040    |
| C15  | 0.006938     | C15A | 0.003828     | C15B | 0.006277     | C15C | 0.006240     |
| Cu1  | 0.622945     | Cu1A | 0.607783     | Cu1B | 0.629248     | Cu1C | 0.617967     |
| N1   | -0.013087    | N1A  | -0.010534    | N1B  | -0.009078    | N1C  | -0.007983    |
| N2   | 0.093307     | N2A  | 0.077426     | N2B  | 0.084287     | N2C  | 0.075716     |
| N3   | 0.104672     | N3A  | 0.090778     | N3B  | 0.106739     | N3C  | 0.094411     |
| N4   | 0.112106     | N4A  | 0.086260     | N4B  | 0.094002     | N4C  | 0.096819     |
| N5   | -0.000273    | N5A  | -0.005678    | N5B  | -0.000289    | N5C  | 0.002540     |
| N6   | -0.004611    | N6A  | -0.000859    | N6B  | -0.004012    | N6C  | -0.007500    |
| O1   | 0.006683     | O1A  | 0.006358     | O1B  | 0.006592     | O1C  | 0.010886     |
| O2   | 0.102252     | O2A  | 0.100784     | O2B  | 0.101660     | O2C  | 0.120023     |
| O3   | 0.015720     | O3A  | 0.014673     | O3B  | 0.016285     | O3C  | 0.022554     |
| O4   | -0.000028    | O4A  | 0.023727     | O4B  | 0.002117     | O4C  | -0.000804    |
| O5   | -0.000112    | O5A  | 0.013076     | O5B  | 0.001769     | O5C  | -0.001626    |
| O6   | 0.000306     | O6A  | 0.015570     | O6B  | 0.001665     | O6C  | -0.000200    |

ESI 4 Table 3: Spin densities for C3 Complex.

| atom | Spin density | atom | Spin density | Atom | Spin density |
|------|--------------|------|--------------|------|--------------|
| C1   | -0.004717    | C1A  | -0.004586    | C1B  | -0.006049    |
| C2   | -0.005017    | C2A  | -0.005114    | C2B  | -0.005081    |
| C3   | -0.008354    | C3A  | -0.014804    | C3B  | -0.006942    |
| C4   | 0.005372     | C4A  | 0.009559     | C4B  | 0.009872     |
| C5   | -0.007818    | C5A  | -0.006480    | C5B  | -0.005853    |
| C6   | -0.004727    | C6A  | -0.004054    | C6B  | 0.000039     |
| C7   | 0.006061     | C7A  | 0.005676     | C7B  | 0.006389     |
| C8   | -0.001204    | C8A  | -0.000364    | C8B  | 0.001322     |
| C9   | 0.000348     | C9A  | 0.000657     | C9B  | 0.001157     |
| C10  | 0.001876     | C10A | 0.001884     | C10B | 0.000250     |
| C11  | -0.008259    | C11A | -0.012798    | C11B | -0.002215    |
| C12  | -0.008111    | C12A | -0.005427    | C12B | -0.008445    |
| C13  | -0.003632    | C13A | -0.000263    | C13B | -0.001510    |
| C14  | 0.012371     | C14A | -0.006232    | C14B | -0.019378    |
| C15  | 0.000845     | C15A | -0.006668    | C15B | -0.005219    |
| C16  | -0.009210    | C16A | -0.003864    | C16B | -0.005587    |
| C17  | -0.023033    | C17A | -0.014439    | C17B | -0.017619    |
| C18  | 0.006436     | C18A | 0.005708     | C18B | 0.003853     |
| C19  | -0.004430    | C19A | -0.007659    | C19B | -0.004926    |
| C20  | 0.009306     | C20A | 0.005844     | C20B | 0.007189     |
| C21  | 0.018258     | C21A | -0.001698    | C21B | 0.010655     |
| C22  | -0.003788    | C22A | -0.001595    | C22B | -0.000066    |
| C23  | 0.002195     | C23A | -0.000370    | C23B | 0.000434     |
| C24  | 0.000640     | C24A | 0.000994     | C24B | 0.000473     |
| C25  | 0.001742     | C25A | 0.001070     | C25B | 0.001555     |
| C26  | -0.004072    | C26A | -0.005215    | C26B | -0.003248    |
| C27  | -0.000362    | C27A | -0.000722    | C27B | -0.001248    |
| C28  | -0.008537    | C28A | -0.008729    | C28B | -0.008913    |

|     |           |      |           |      |           |
|-----|-----------|------|-----------|------|-----------|
| Cu1 | 0.733575  | Cu1A | 0.745663  | Cu1B | 0.724377  |
| N1  | 0.024905  | N1A  | 0.026027  | N1B  | 0.025105  |
| N2  | -0.017325 | N2A  | -0.017089 | N2B  | -0.016753 |
| N3  | 0.004664  | N3A  | 0.004911  | N3B  | 0.004878  |
| N4  | 0.100039  | N4A  | 0.084748  | N4B  | 0.110930  |
| N5  | 0.065500  | N5A  | 0.045356  | N5B  | 0.091421  |
| N6  | 0.051085  | N6A  | 0.052734  | N6B  | 0.030739  |
| N7  | 0.106027  | N7A  | 0.119901  | N7B  | 0.090260  |
| N8  | -0.017739 | N8A  | -0.010268 | N8B  | -0.016760 |
| N9  | 0.006380  | N9A  | 0.014915  | N9B  | 0.004783  |
| N10 | 0.001988  | N10A | 0.004789  | N10B | 0.001685  |

ESI 4 Table 4: Spin densities for C4 Complex.

| Atom | Spin density | Atom | Spin density | Atom | Spin density |
|------|--------------|------|--------------|------|--------------|
| C1   | 0.008984     | C1A  | 0.003101     | C1B  | 0.008998     |
| C2   | -0.031142    | C2A  | -0.010734    | C2B  | -0.009021    |
| C3   | 0.004054     | C3A  | 0.002244     | C3B  | -0.004538    |
| C4   | -0.005229    | C4A  | -0.007311    | C4B  | -0.004846    |
| C5   | -0.009630    | C5A  | 0.003238     | C5B  | -0.000089    |
| C6   | 0.001705     | C6A  | 0.005697     | C6B  | 0.006054     |
| C7   | -0.004084    | C7A  | -0.004382    | C7B  | -0.003950    |
| C8   | 0.006859     | C8A  | 0.007599     | C8B  | 0.010778     |
| C9   | 0.003145     | C9A  | 0.002004     | C9B  | 0.001471     |
| C10  | 0.000254     | C10A | -0.003584    | C10B | -0.007000    |
| C11  | 0.005734     | C11A | 0.004555     | C11B | 0.005953     |
| C12  | -0.000074    | C12A | 0.001524     | C12B | 0.000672     |
| C13  | -0.000045    | C13A | 0.001198     | C13B | 0.001093     |
| C14  | -0.005511    | C14A | -0.008150    | C14B | -0.010618    |
| C15  | 0.005204     | C15A | 0.008289     | C15B | 0.007316     |
| C16  | -0.012307    | C16A | -0.012917    | C16B | -0.010631    |
| C11  | 0.004559     | C11A | 0.002799     | C11B | 0.007879     |
| C12  | 0.152753     | C12A | 0.154245     | C12B | 0.164690     |
| Cu1  | 0.582206     | Cu1A | 0.582774     | Cu1B | 0.582540     |
| N1   | 0.099380     | N1A  | 0.105936     | N1B  | 0.104741     |
| N2   | 0.086695     | N2A  | 0.082891     | N2B  | 0.079758     |
| N3   | -0.010287    | N3A  | -0.010921    | N3B  | -0.006111    |
| N4   | 0.106488     | N4A  | 0.086797     | N4B  | 0.075955     |

ESI 4 Table 5: Spin densities for C5 Complex.

| Atom | Spin density | Atom | Spin density |
|------|--------------|------|--------------|
| Br1  | 0.178704     | Br1A | 0.195366     |
| Br2  | 0.013402     | Br2A | 0.008609     |
| C1   | 0.009514     | C1A  | 0.008174     |
| C2   | -0.021965    | C2A  | -0.012068    |
| C3   | 0.007312     | C3A  | 0.001801     |
| C4   | -0.010017    | C4A  | -0.009355    |
| C5   | -0.019636    | C5A  | -0.011404    |
| C6   | 0.003260     | C6A  | 0.000255     |
| C7   | -0.004036    | C7A  | -0.01867     |
| C8   | 0.005729     | C8A  | 0.006057     |
| C9   | 0.020799     | C9A  | 0.019693     |
| C10  | -0.007171    | C10A | -0.015559    |
| C11  | 0.006191     | C11A | 0.009895     |
| C12  | 0.000987     | C12A | -0.000031    |
| C13  | 0.000992     | C13A | -0.000565    |
| C14  | -0.009931    | C14A | -0.006004    |
| C15  | 0.009081     | C15A | 0.006177     |
| C16  | -0.013677    | C16A | -0.013138    |
| Cu1  | 0.563468     | Cu1A | 0.556919     |
| N1   | 0.095853     | N1A  | 0.082896     |
| N2   | -0.003585    | N2A  | -0.003277    |
| N3   | 0.066571     | N3A  | 0.066421     |
| N4   | 0.104720     | N4A  | 0.110388     |

ESI 4 Table 6: Spin densities for C6 Complex.

| Atom | Spin density | Atom | Spin density |
|------|--------------|------|--------------|
| C1   | -0.011372    | C1A  | -0.011342    |
| C2   | 0.007192     | C2A  | 0.007175     |
| C3   | -0.007995    | C3A  | 0.007977     |
| C4   | 0.003734     | C4A  | 0.003721     |
| C5   | -0.004861    | C5A  | -0.004842    |
| C6   | 0.002356     | C6A  | 0.002381     |
| C7   | 0.000759     | C7A  | 0.000725     |
| C8   | 0.006409     | C8A  | 0.006435     |
| C9   | 0.002462     | C9A  | 0.002429     |
| C10  | -0.007765    | C10A | -0.007773    |
| C11  | 0.006310     | C11A | 0.006314     |
| C12  | -0.017171    | C12A | -0.017175    |
| C13  | -0.005013    | C13A | -0.005000    |
| C14  | 0.002520     | C14A | 0.002504     |
| C15  | -0.008498    | C15A | -0.008493    |

|     |           |      |           |
|-----|-----------|------|-----------|
| C16 | -0.000807 | C16A | -0.000807 |
| Cu1 | 0.611409  | Cu1A | 0.611478  |
| N1  | 0.108767  | N1A  | 0.108709  |
| N2  | 0.117648  | N2A  | 0.117609  |
| N3  | -0.016549 | N3A  | -0.116548 |
| N4  | 0.094914  | N4A  | 0.094895  |
| N5  | -0.004788 | N5A  | -0.004782 |
| N6  | -0.004607 | N6A  | -0.004607 |
| O1  | -0.000427 | O1A  | -0.000431 |
| O5  | 0.004048  | O5A  | 0.004025  |
| O6  | 0.015592  | O6A  | 0.015649  |
| O7  | 0.100539  | O7A  | 0.100539  |

ESI 4 Table 7: Spin densities for C7 Complex.

| Atom | Spin density |
|------|--------------|------|--------------|------|--------------|------|--------------|
| C1   | -0.011665    | C1A  | -0.012064    | C1B  | -0.008678    | C1C  | -0.012211    |
| C2   | 0.006730     | C2A  | 0.005568     | C2B  | 0.007471     | C2C  | 0.003464     |
| C3   | -0.007318    | C3A  | 0.006546     | C3B  | -0.008977    | C3C  | -0.008030    |
| C4   | 0.002344     | C4A  | 0.003957     | C4B  | 0.003078     | C4C  | 0.007365     |
| C5   | -0.014424    | C5A  | -0.001286    | C5B  | -0.008280    | C5C  | -0.010016    |
| C6   | -0.002135    | C6A  | 0.007705     | C6B  | -0.001364    | C6C  | 0.019320     |
| C7   | 0.008940     | C7A  | 0.007729     | C7B  | 0.009212     | C7C  | 0.012645     |
| C8   | 0.000069     | C8A  | 0.000043     | C8B  | 0.000936     | C8C  | 0.000776     |
| C9   | 0.000008     | C9A  | 0.001563     | C9B  | 0.001146     | C9C  | 0.001773     |
| C10  | -0.009405    | C10A | -0.004560    | C10B | -0.004355    | C10C | -0.004988    |
| C11  | 0.002764     | C11A | 0.002548     | C11B | 0.006152     | C11C | 0.000735     |
| C12  | -0.017690    | C12A | -0.012845    | C12B | -0.001769    | C12C | -0.012211    |
| C13  | -0.005356    | C13A | -0.004474    | C13B | -0.005377    | C13C | -0.006144    |
| C14  | 0.005167     | C14A | 0.004142     | C14B | -0.004803    | C14C | 0.002554     |
| C15  | -0.022957    | C15A | -0.010816    | C15B | -0.001247    | C15C | -0.006413    |
| C1I  | 0.128107     | C1IA | 0.162319     | C1IB | 0.159862     | C1IC | 0.139082     |
| C12  | 0.002903     | C12A | 0.007573     | C12B | 0.008439     | C12C | 0.007949     |
| Cu1  | 0.587752     | Cu1A | 0.586790     | Cu1B | 0.585041     | Cu1C | 0.600481     |
| N1   | 0.118770     | N1A  | 0.091855     | N1B  | 0.097115     | N1C  | 0.104374     |
| N2   | 0.114823     | N2A  | 0.092040     | N2B  | 0.091542     | N2C  | 0.095266     |
| N3   | -0.012992    | N3A  | -0.013641    | N3B  | -0.005485    | N3c  | -0.014182    |
| N4   | 0.113923     | N4A  | 0.093598     | N4B  | 0.078849     | N4C  | 0.085369     |
| N5   | -0.000457    | N5A  | -0.004024    | N5B  | -0.002828    | N5C  | -0.003386    |

ESI 4 Table 8: Spin densities for radical R1.

| Atom | Spin density | Atom | Spin density |
|------|--------------|------|--------------|
| Fe   | -0.020182    | O10  | -0.010961    |
| O20  | -0.011160    | N11  | 0.424098     |
| N12  | 0.179289     | N13  | 0.177891     |
| N14  | 0.424869     | N21  | 0.425118     |
| N22  | 0.176974     | N23  | 0.178379     |
| N24  | 0.422995     | C10  | -0.047415    |
| C11  | 0.014274     | C12  | 0.004836     |
| C13  | 0.003748     | C14  | 0.010054     |
| C15  | -0.142185    | C16  | -0.043785    |
| C17  | -0.005970    | C18  | -0.005313    |
| C20  | -0.045806    | C21  | 0.010285     |
| C22  | 0.004025     | C23  | 0.004214     |
| C24  | 0.013540     | C25  | -0.137299    |
| C26  | -0.042336    | C27  | -0.004783    |
| C28  | -0.006511    |      |              |

ESI 4 Table 9: Spin densities for radical R2.

| Atom | Spin density | Atom | Spin density |
|------|--------------|------|--------------|
| S1   | 0.259325     | S1A  | 0.259292     |
| S2   | 0.260502     | S2A  | 0.260525     |
| C1   | -0.080878    | C1A  | -0.080876    |
| C2   | -0.084607    | C2A  | 0.-0.84597   |
| N1   | 0.166733     | N1A  | 0.166773     |
| N2   | 0.164976     | N2A  | 0.165004     |
| N3   | 0.158513     | N3A  | 0.158485     |
| N4   | 0.155437     | N4A  | 0.155393     |

ESI 4 Table 10: Spin densities for radical R3.

| Atom | Spin density | Atom | Spin density |
|------|--------------|------|--------------|
| C1   | 0.026018     | C1A  | 0.026018     |
| C2   | -0.090644    | C2A  | -0.090644    |
| C3   | 0.283301     | C3A  | 0.283301     |
| C4   | -0.121845    | C4A  | -0.121845    |
| C5   | 0.303823     | C5A  | 0.303823     |
| C6   | -0.095435    | C6A  | -0.095435    |
| C7   | 0.292192     | C7A  | 0.292192     |
| C8   | -0.120549    | C8A  | -0.120549    |



|     |           |      |           |
|-----|-----------|------|-----------|
| C9  | -0.120549 | C9A  | -0.120549 |
| C10 | -0.120549 | C10A | -0.120549 |
| C11 | 0.274084  | C11A | 0.274084  |
| C12 | -0.124767 | C12A | -0.124767 |
| C13 | 0.312472  | C13A | 0.312472  |

ESI 4 Table 11: Spin densities for radical R4.

| Atom | Spin density | Atom | Spin density |
|------|--------------|------|--------------|
| B    | -0.017404    | B1A  | -0.017404    |
| O1   | 0.022689     | O1A  | 0.022689     |
| N1   | 0.059027     | N1A  | 0.059027     |
| C1   | 0.106529     | C1A  | 0.106529     |
| C2   | -0.047562    | C2A  | -0.047562    |
| C3   | 0.104074     | C3AB | 0.104074     |
| C3A  | -0.036405    | C3AA | -0.036405    |
| C4   | 0.139232     | C4A  | 0.139232     |
| C5   | -0.057530    | C5A  | -0.057530    |
| C6   | 0.126461     | C6AB | 0.126461     |
| C6A  | -0.034504    | C6AA | -0.034504    |
| C7   | 0.121323     | C7A  | 0.121323     |
| C8   | -0.051376    | C8A  | -0.051376    |
| C9   | 0.111002     | C9AB | 0.111002     |
| C9A  | -0.053350    | C9AA | -0.053350    |
| C9B  | 0.016130     | C9BA | 0.016130     |

ESI 4 Table 12: Spin densities for radical R4\*.

| Atom | Spin density | Atom | Spin density |
|------|--------------|------|--------------|
| B1   | -0.015141    | B1A  | -0.015141    |
| O1   | 0.015596     | O1A  | 0.015596     |
| N1   | 0.034700     | N1A  | 0.034700     |
| C1   | 0.085759     | C1A  | 0.085759     |
| C2   | -0.040810    | C2A  | -0.040810    |
| C3   | 0.078412     | C3AB | 0.078412     |
| C3A  | -0.026801    | C3AA | -0.026801    |
| C4   | 0.096716     | C4A  | 0.096716     |
| C5   | -0.039488    | C5A  | -0.039488    |
| C6   | 0.090113     | C6AB | 0.090113     |
| C6A  | -0.026272    | C6AA | -0.026272    |
| C7   | 0.091752     | C7A  | 0.091752     |
| C8   | -0.044882    | C8A  | -0.044882    |
| C9   | 0.094557     | C9AB | 0.094557     |
| C9A  | -0.042711    | C9AA | -0.042711    |
| C9B  | 0.012623     | C9BA | 0.012623     |

ESI 4 Table 13: Spin densities for radical R5.

| Atom | Spin density | Atom | Spin density |
|------|--------------|------|--------------|
| B1   | -0.011280    | B1A  | -0.011280    |
| O1   | 0.024784     | O1A  | 0.024784     |
| N1   | 0.059116     | N1A  | 0.059116     |
| C1   | 0.106653     | C1A  | 0.106653     |
| C2   | -0.050432    | C2A  | -0.050432    |
| C3   | 0.115091     | C3AB | 0.115091     |
| C3A  | -0.036448    | C3AA | -0.036448    |
| C4   | 0.141162     | C4A  | 0.141162     |
| C5   | -0.058976    | C5A  | -0.058976    |
| C6   | 0.137335     | C6AB | 0.137335     |
| C6A  | -0.038189    | C6AA | -0.038189    |
| C7   | 0.123582     | C7A  | 0.123582     |
| C8   | -0.047376    | C8A  | -0.047376    |
| C9   | 0.107798     | C9AB | 0.107798     |
| C9A  | -0.044711    | C9AA | -0.044711    |
| C9B  | 0.013000     | C9BA | 0.013000     |

ESI 4 Table 14: Spin densities for radical R6.

| Atom | Spin density | Atom | Spin density |
|------|--------------|------|--------------|
| Ni2  | 0.093808     | Ni2  | 0.093819     |
| S5   | 0.183028     | S5   | 0.182975     |
| S6   | 0.221283     | S6   | 0.221245     |
| S7   | 0.198678     | S7   | 0.198775     |
| S8   | 0.255378     | S8   | 0.255367     |
| N5   | 0.006457     | N5   | 0.006449     |
| N6   | 0.009806     | N6   | 0.009798     |
| N7   | 0.011262     | N7   | 0.011281     |
| N8   | 0.010134     | N8   | 0.010123     |
| C9   | 0.003783     | C9   | 0.003791     |
| C10  | 0.002413     | C10  | 0.002388     |
| C11  | 0.006298     | C11  | 0.006277     |
| C12  | -0.005764    | C12  | -0.005759    |

|     |           |     |           |
|-----|-----------|-----|-----------|
| C13 | -0.004294 | C13 | -0.004310 |
| C14 | 0.021097  | C14 | 0.021136  |
| C15 | -0.011760 | C15 | -0.011756 |
| C16 | -0.001607 | C16 | -0.001599 |

ESI 4 Table 15: Spin densities for radical R7.

| Atom | Spin density | Atom | Spin density |
|------|--------------|------|--------------|
| Ni1  | 0.104048     | Ni1  | 0.104011     |
| S1   | 0.202953     | S1   | 0.202858     |
| S2   | 0.184108     | S2   | 0.184010     |
| S3   | 0.232722     | S3   | 0.232857     |
| S4   | 0.203038     | S4   | 0.203121     |
| N1   | 0.010350     | N1   | 0.010338     |
| N2   | 0.009115     | N2   | 0.009100     |
| N3   | 0.010562     | N3   | 0.010588     |
| N4   | 0.010680     | N4   | 0.010700     |
| C1   | -0.000765    | C1   | -0.000756    |
| C2   | 0.020240     | C2   | 0.020161     |
| C3   | 0.000640     | C3   | 0.000616     |
| C4   | 0.002352     | C4   | 0.002348     |
| C5   | 0.000309     | C5   | 0.000299     |
| C6   | -0.003220    | C6   | -0.003188    |
| C7   | 0.020760     | C7   | 0.020817     |
| C8   | -0.007886    | C8   | -0.007889    |

ESI 4 Table 16: Spin densities for radical R8.

| Atom | Spin density | atom | Spin density | Atom | Spin density |
|------|--------------|------|--------------|------|--------------|
| O1   | -0.010027    | O1A  | -0.011167    | O1B  | -0.011459    |
| N1   | 0.161995     | N1A  | 0.191378     | N1B  | 0.187384     |
| N2   | 0.391804     | N2A  | 0.403222     | N2B  | 0.406143     |
| N3   | 0.393547     | N3A  | 0.407677     | N3B  | 0.413944     |
| N4   | 0.184308     | N4A  | 0.193435     | N4B  | 0.191612     |
| N5   | -0.031290    | N5A  | -0.018308    | N5B  | -0.016449    |
| C1   | -0.048565    | C1A  | -0.038609    | C1B  | -0.031862    |
| C2   | -0.068664    | C2A  | -0.182751    | C2B  | -0.190170    |
| C3   | 0.049375     | C3A  | -0.015142    | C3B  | -0.011319    |
| C4   | 0.006933     | C4A  | 0.019272     | C4B  | 0.013706     |
| C5   | 0.027156     | C5A  | 0.021776     | C5B  | 0.025381     |
| C6   | -0.018475    | C6A  | -0.026861    | C6B  | -0.022644    |
| C7   | -0.008113    | C7A  | 0.013706     | C7B  | 0.003698     |
| C8   | -0.011086    | C8A  | -0.007102    | C8B  | -0.014166    |
| C9   | -0.017400    | C9A  | -0.014601    | C9B  | -0.014649    |

ESI 4 Table 17: Spin densities for radical R9.

| Atom | Spin density | Atom | Spin density |
|------|--------------|------|--------------|
| B1   | -0.002093    | B1A  | -0.001413    |
| O1   | 0.017962     | O1B  | 0.018483     |
| C1   | 0.131391     | C1B  | 0.118393     |
| C2   | -0.060401    | C2B  | -0.061699    |
| C3   | 0.129303     | C3D  | 0.123785     |
| C3A  | -0.060144    | C3E  | -0.060847    |
| C4   | 0.147381     | C4B  | 0.142410     |
| C5   | -0.059030    | C5B  | -0.052571    |
| C6   | 0.134858     | C6D  | 0.141914     |
| C6A  | -0.050258    | C6E  | -0.053161    |
| C7   | 0.134801     | C7B  | 0.143739     |
| C8   | -0.056219    | C8B  | -0.066650    |
| C9   | 0.138356     | C9F  | 0.155670     |
| C9A  | -0.059113    | C9H  | -0.056171    |
| C9B  | 0.019809     | C9J  | 0.021960     |
| N9   | 0.026476     | N9B  | 0.023197     |
| C10  | -0.009688    | C10B | -0.010442    |
| C11  | -0.004240    | C11B | -0.007792    |
| C12  | 0.002676     | C12B | -0.001192    |
| C13  | 0.002104     | C13B | 0.004647     |
| C14  | 0.000470     | C14B | 0.001097     |
| C15  | 0.001130     | C15B | 0.001012     |
| C16  | 0.004213     | C16B | 0.003247     |
| O1A  | 0.018086     | O1C  | 0.018560     |
| C1A  | 0.131699     | C1C  | 0.118573     |
| C2A  | -0.060399    | C2C  | -0.061689    |
| C3B  | 0.129554     | C3F  | 0.123988     |
| C3C  | -0.060145    | C3H  | -0.060821    |
| C4A  | 0.147617     | C4C  | 0.142487     |
| C5A  | -0.059026    | C5C  | -0.052498    |
| C6B  | 0.135088     | C6F  | 0.141970     |
| C6C  | -0.050296    | C6H  | -0.053100    |
| C7A  | 0.135217     | C7C  | 0.143905     |
| C8A  | -0.056211    | C8C  | -0.066581    |
| C9C  | 0.138691     | C9K  | 0.155898     |
| C9D  | -0.059121    | C9L  | -0.056145    |
| C9E  | 0.019895     | C9M  | 0.022002     |
| N9A  | 0.026637     | N9C  | 0.023357     |

|      |           |      |           |
|------|-----------|------|-----------|
| C10A | -0.009695 | C10C | -0.010451 |
| C11A | -0.004255 | C11C | -0.007802 |
| C12A | 0.002687  | C12C | -0.001128 |
| C13A | 0.002102  | C13C | 0.004642  |
| C14A | 0.000471  | C14C | 0.001099  |
| C15A | 0.001131  | C15C | 0.001014  |
| C16A | 0.004227  | C16C | 0.003249  |

ESI 4 Table 18: Spin densities for radical R10.

| Atom | Spin density | Atom | Spin density |
|------|--------------|------|--------------|
| Ni1  | 0.095381     | Ni1A | 0.095399     |
| S1   | 0.203485     | S1A  | 0.203427     |
| S2   | 0.199839     | S2A  | 0.199831     |
| S3   | 0.208559     | S3A  | 0.208604     |
| S4   | 0.188784     | S4A  | 0.188838     |
| N1   | 0.010168     | N1A  | 0.010167     |
| N2   | 0.008698     | N2A  | 0.008695     |
| N3   | 0.011301     | N3A  | 0.011304     |
| N4   | 0.007798     | N4A  | 0.007799     |
| C1   | -0.005396    | C1A  | -0.005419    |
| C2   | 0.009062     | C2A  | 0.009065     |
| C3   | 0.005860     | C3A  | 0.005819     |
| C4   | -0.000644    | C4A  | -0.000656    |
| C5   | -0.005223    | C5A  | -0.005243    |
| C6   | 0.022261     | C6A  | 0.022340     |
| C7   | 0.044087     | C7A  | 0.044080     |
| C8   | -0.004014    | C8A  | -0.004059    |
